# Supplementary material for: The Influence of Particle Concentration on the Formation of Settling-Driven Gravitational Instabilities at the Base of Volcanic Clouds
Source: Frontiers journal article supplement (doi:10.3389/feart.2021.640090), 2021-06-03
Supplement: Data_Sheet_1.PDF [file Data_Sheet_1.PDF]

**Supplementary Table 1.** List of symbols

| Notation         |                                                              | Units                              |
|------------------|--------------------------------------------------------------|------------------------------------|
| $a$              | dimensionless attenuation                                    | -                                  |
| $d$              | particle diameter                                            | m                                  |
| $f$              | drag factor                                                  | -                                  |
| $g$              | acceleration due to gravity                                  | m s <sup>-2</sup>                  |
| $g'$             | reduced gravity                                              | m s <sup>-2</sup>                  |
| $k_N$            | Newton drag correction                                       | -                                  |
| $k_S$            | Stokes drag correction                                       | -                                  |
| $l$              | depth below the upper layer                                  | m                                  |
| $m$              | exponent on reduced gravity                                  | -                                  |
| $m_t$            | mass below $l$ detected at a time $t$                        |                                    |
| $n$              | number of fingers                                            | -                                  |
| $p$              | slope of the linear regression between $I$ and $c_d$         | m <sup>3</sup> kg <sup>-1</sup>    |
| $r$              | radial component of the polar coordinates                    | m                                  |
| $t$              | time                                                         | s                                  |
| $t_i$            | duration required to develop an unstable region              | s                                  |
| $w$              | experimental tank width                                      | m                                  |
| $x$              | distance travelled by the laser inside the experimental tank | m                                  |
| $z$              | height (from the initial density interface)                  | m                                  |
| $A$              | area of the horizontal cross section of the experiment       | m <sup>2</sup>                     |
| $C$              | local particle concentration                                 | kg m <sup>-3</sup>                 |
| $C_u$            | initial particle concentration of the upper layer            | kg m <sup>-3</sup>                 |
| $D$              | fluorescent dye concentration                                | kg m <sup>-3</sup>                 |
| $D_{50}$         | median particle diameter                                     | m                                  |
| $D_{16}$         | 16 <sup>th</sup> percentile diameter                         | m                                  |
| $D_{84}$         | 84 <sup>th</sup> percentile diameter                         | m                                  |
| $F$              | camera digital level (fluorescence)                          | -                                  |
| $F_D$            | Flux by double diffusion                                     | kg m <sup>-2</sup> s <sup>-1</sup> |
| $F_{\text{exp}}$ | Particle mass flux measured in experiments                   | kg m <sup>-2</sup> s <sup>-1</sup> |
| $F_I$            | Particle mass flux by individual settling                    | kg m <sup>-2</sup> s <sup>-1</sup> |

|            |                                                           |                                    |
|------------|-----------------------------------------------------------|------------------------------------|
| $H_1$      | upper layer thickness                                     | m                                  |
| $H_2$      | lower layer thickness                                     | m                                  |
| $I$        | dimensionless light intensity                             | -                                  |
| $L$        | characteristic flow thickness                             | m                                  |
| $L^*$      | ratio between the cloud and the PBL thickness             | m                                  |
| $P$        | dimensionless laser power                                 | -                                  |
| $R$        | residual light effect on digital level                    | -                                  |
| $V$        | characteristic flow velocity                              | m s <sup>-1</sup>                  |
| $V_f$      | finger velocity                                           | m s <sup>-1</sup>                  |
| $V_p$      | particle settling velocity                                | m s <sup>-1</sup>                  |
| $W$        | finger width                                              | m                                  |
| $X_f$      | fluid mixing ratio                                        | -                                  |
| $X_p$      | particle volume fraction                                  | -                                  |
| $At$       | Atwood number                                             | -                                  |
| $Gr$       | Grashof number                                            | -                                  |
| $Re$       | Reynolds number                                           | -                                  |
| $Re_p$     | particle Reynolds number                                  | -                                  |
| $St$       | Stokes number                                             | -                                  |
| $\alpha$   | empirical scaling parameter for the time                  | m s <sup>-1</sup>                  |
| $\beta_m$  | volumetric expansion coefficient of a particle suspension | -                                  |
| $\gamma$   | spatial intensity distribution                            | m <sup>-1</sup> rad <sup>-1</sup>  |
| $\delta$   | PBL thickness                                             | m                                  |
| $\delta_f$ | characteristic fluctuation lengthscale                    | m                                  |
| $\epsilon$ | fluorescent dye absorption coefficient                    | m <sup>2</sup> kg <sup>-1</sup>    |
| $\kappa_f$ | diffusion coefficient of the fastest diffusing substance  | m <sup>2</sup> s <sup>-1</sup>     |
| $\kappa_p$ | diffusion coefficient of the particles                    | m <sup>2</sup> s <sup>-1</sup>     |
| $\lambda$  | finger spacing                                            | m                                  |
| $\mu$      | fluid dynamic viscosity                                   | kg m <sup>-1</sup> s <sup>-1</sup> |
| $\theta$   | angular component of the polar coordinates                | rad                                |
| $\nu$      | fluid kinematic viscosity                                 | m <sup>2</sup> s <sup>-1</sup>     |
| $\rho$     | PBL density                                               | kg m <sup>-3</sup>                 |
| $\rho_a$   | ambient density                                           | kg m <sup>-3</sup>                 |
| $\rho_f$   | fluid density                                             | kg m <sup>-3</sup>                 |
| $\rho_p$   | particle density                                          | kg m <sup>-3</sup>                 |

|            |                                                             |                          |
|------------|-------------------------------------------------------------|--------------------------|
| $\rho_s$   | sugar solution density                                      | $\text{kg m}^{-3}$       |
| $\rho_u$   | density of the upper layer                                  | $\text{kg m}^{-3}$       |
| $\rho_w$   | water density                                               | $\text{kg m}^{-3}$       |
| $\sigma$   | sorting parameter (Inman, 1952)                             | m                        |
| $\phi$     | fluorescent dye quantum efficiency                          | -                        |
| $\Delta A$ | pixel area                                                  | $\text{m}^2 \text{ rad}$ |
| $\Delta m$ | difference in particle mass between successive measurements | kg                       |
| $\Delta t$ | time step of the particle mass flux measurements            | s                        |
| $\Delta U$ | characteristic velocity fluctuations                        | $\text{m s}^{-1}$        |
| $\Sigma$   | sedimentation number                                        | -                        |

---
