# Supplementary material for: The Influence of Particle Concentration on the Formation of Settling-Driven Gravitational Instabilities at the Base of Volcanic Clouds
Source: Frontiers journal article supplement (doi:10.3389/feart.2021.640090), 2021-06-03
Supplement: Data_Sheet_2.pdf [file Data_Sheet_2.pdf]

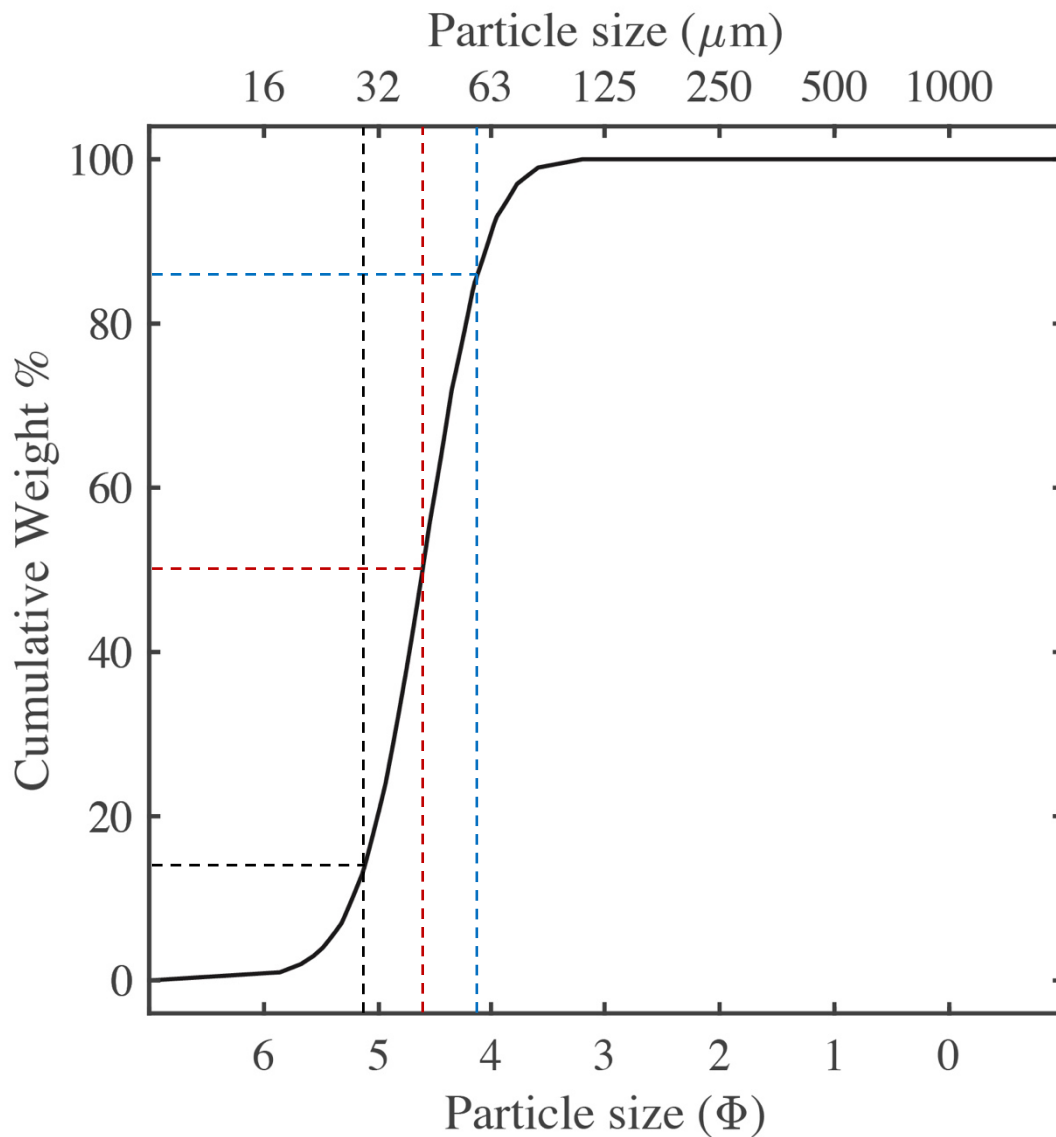

**Supplementary Figure 1.** Cumulative grain size distribution of the glass beads used in the experiments ( $D_{50} = 41.5 \mu\text{m}$ ,  $\sigma = 14 \mu\text{m}$ ). The grain size distribution was obtained by laser diffraction using a BetterSizer S3 Plus. The dotted black, red and blue lines respectively indicate the 14<sup>th</sup>, 50<sup>th</sup> and 86<sup>th</sup> percentiles.
