# Supplementary material for: The Influence of Particle Concentration on the Formation of Settling-Driven Gravitational Instabilities at the Base of Volcanic Clouds
Source: Frontiers journal article supplement (doi:10.3389/feart.2021.640090), 2021-06-03
Supplement: Data_Sheet_3.PDF [file Data_Sheet_3.PDF]

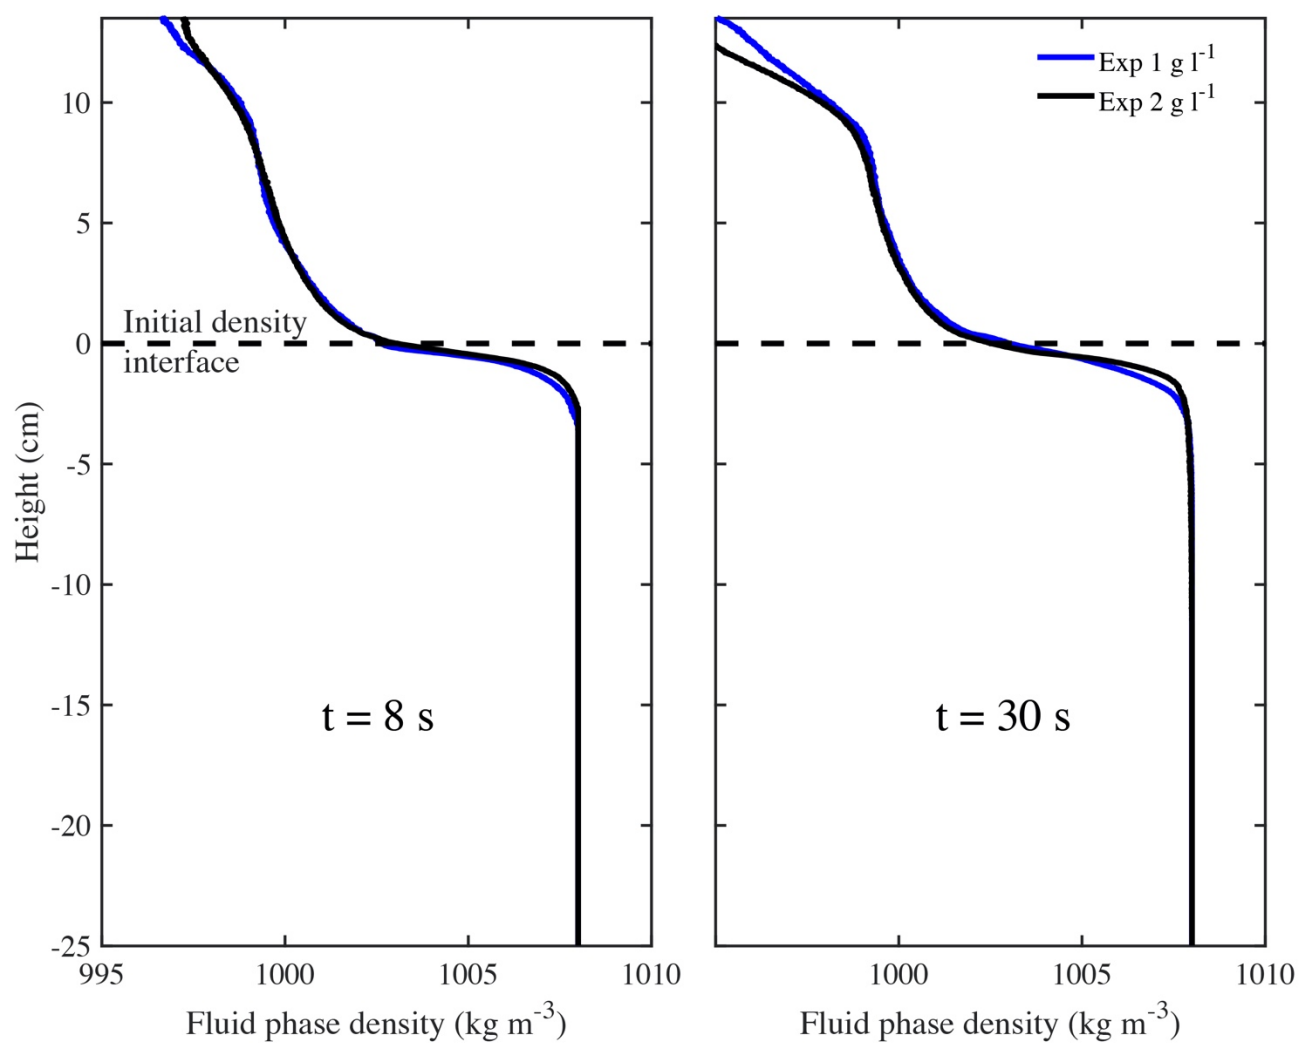

**Supplementary Figure 2.** Comparison of the fluid density profiles for experiments A11 and A12 (with particle concentrations of 1 and 2 g l<sup>-1</sup>, respectively). Results are very similar and reproducible.
