# Supplementary material for: The Influence of Particle Concentration on the Formation of Settling-Driven Gravitational Instabilities at the Base of Volcanic Clouds
Source: Frontiers journal article supplement (doi:10.3389/feart.2021.640090), 2021-06-03
Supplement: Data_Sheet_4.PDF [file Data_Sheet_4.PDF]

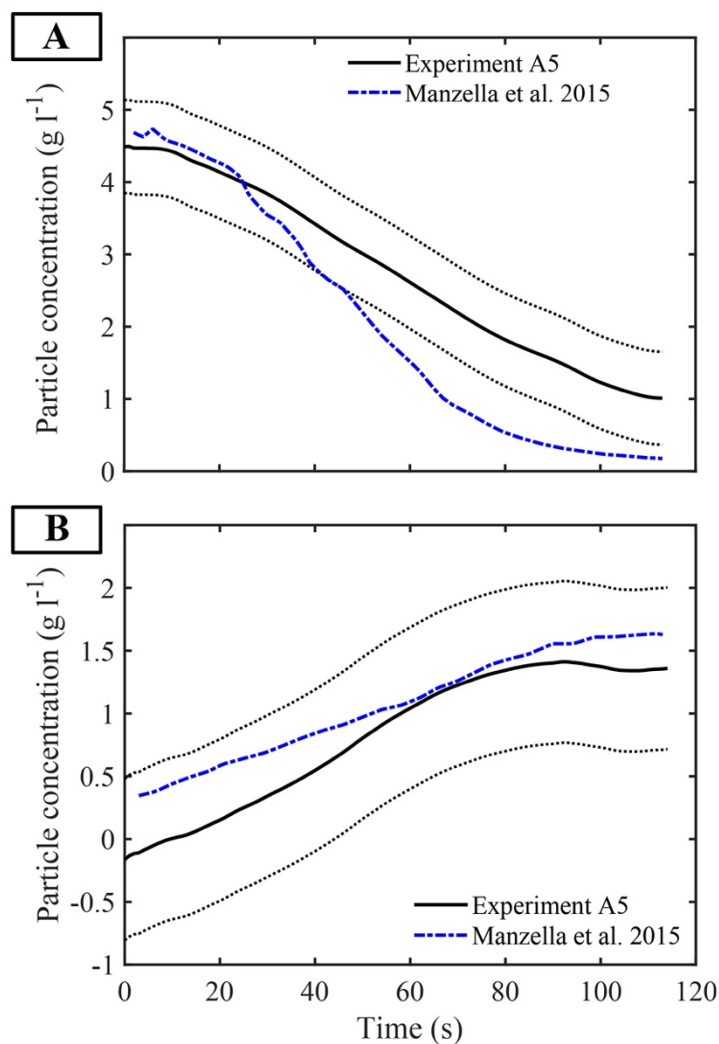

**Supplementary Figure 3.** Temporal evolution of the average particle concentration in experiment A5 (5 g l<sup>-1</sup>) compared with the results of Manzella et al. (2015) obtained in the same conditions, using a different imaging technique, for **(A)** the upper layer and **(B)** the lower layer. Dashed lines correspond to error limits. They are estimated using uniform suspensions, with a known particle concentration, that are imaged in the experimental configuration. The average error is given by the difference between the known particle concentration and the particle concentration inferred from the calibration. The average relative error is 10 to 15 % of the initial particle concentration, depending on the laser power and corresponds to a value of 0.75 g l<sup>-1</sup> for the experiment presented here.
