# Supplementary material for: The Influence of Particle Concentration on the Formation of Settling-Driven Gravitational Instabilities at the Base of Volcanic Clouds
Source: Frontiers journal article supplement (doi:10.3389/feart.2021.640090), 2021-06-03
Supplement: Data_Sheet_6.PDF [file Data_Sheet_6.PDF]

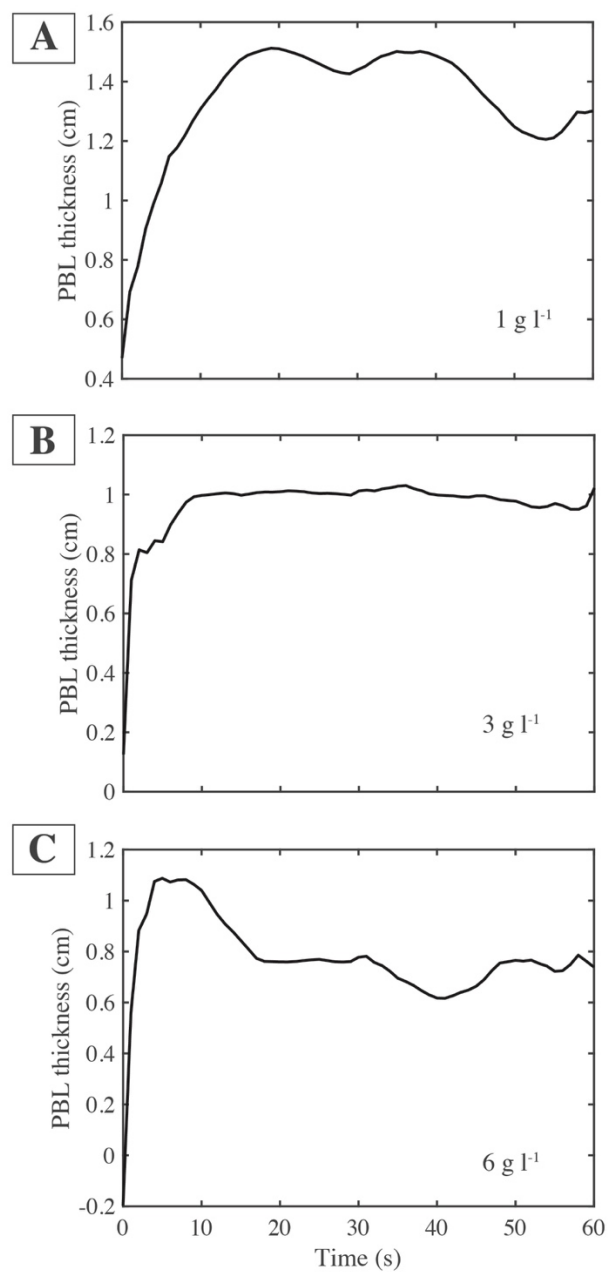

**Supplementary Figure 5.** Automatic determination of the PBL thickness based on the location of the minimum particle concentration gradient during experiment 1 (A. 1 g l<sup>-1</sup>), 3 (B. 3 g l<sup>-1</sup>), 6 (C. 6 g l<sup>-1</sup>)
