# Supplementary material for: The Influence of Particle Concentration on the Formation of Settling-Driven Gravitational Instabilities at the Base of Volcanic Clouds
Source: Frontiers journal article supplement (doi:10.3389/feart.2021.640090), 2021-06-03
Supplement: Data_Sheet_7.pdf [file Data_Sheet_7.pdf]

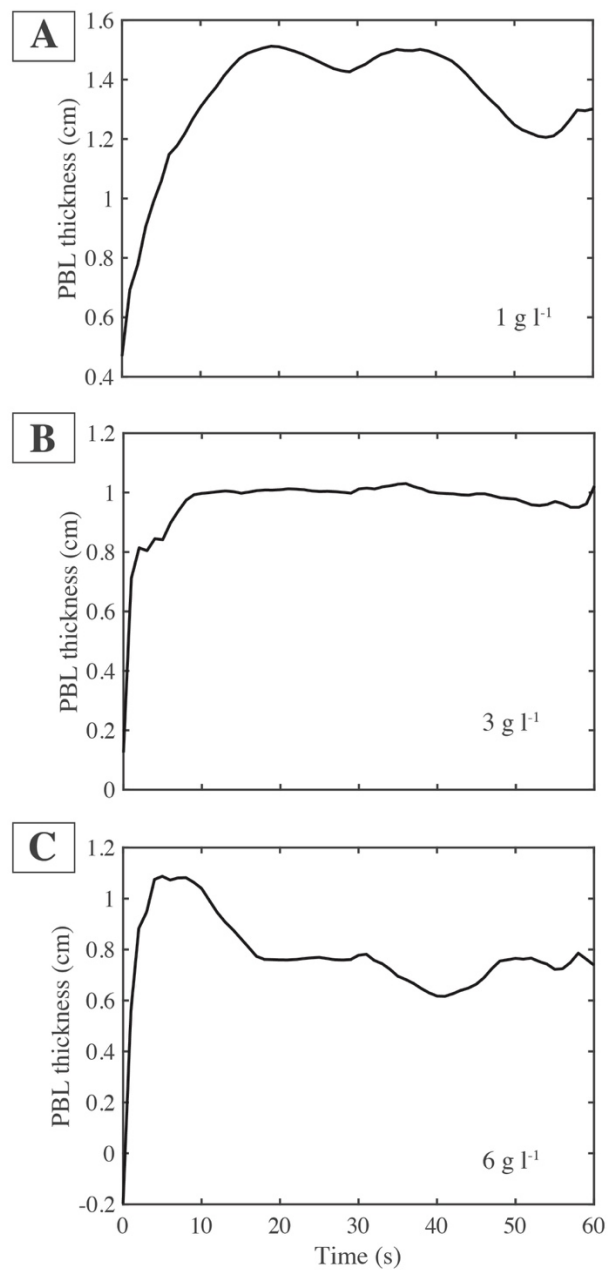

**Supplementary Figure 6.** Automatic determination of the PBL thickness based on the localization of the minimum particle concentration gradient during type A experiment (**A.** 1 g l<sup>-1</sup>), 3 (**B.** 3 g l<sup>-1</sup>), 6 (**C.** 6 g l<sup>-1</sup>)
